# Supplementary material for: First-line chemoimmunotherapy in metastatic breast carcinoma: combination of paclitaxel and IMP321 (LAG-3Ig) enhances immune responses and antitumor activity
Source: Springer Nature journal article supplement (doi:10.1186/1479-5876-8-71), 2010-07-23
Supplement: 12967_2010_493_MOESM2_ESM.pdf [file 12967_2010_493_MOESM2_ESM.pdf]

**Paclitaxel**  
(80 mg/m<sup>2</sup>)

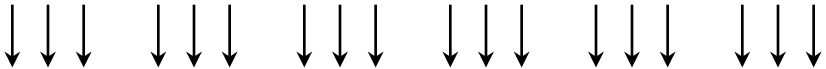

**IMP321**

0.25 mg (n= 8 patients)  
1.25 mg (n= 8 patients)  
6.25 mg (n=14 patients)

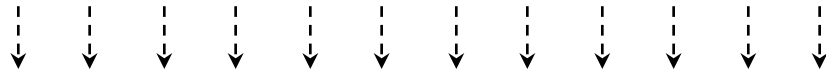

**Day**

1 8 15 29 36 43 57 64 71 85 92 99 113 120 127 141 148 155 170  
2 16 30 44 58 72 86 100 114 128 142 156

**Cycle**

1 2 3 4 5 6 END
