# Supplementary material for: First-line chemoimmunotherapy in metastatic breast carcinoma: combination of paclitaxel and IMP321 (LAG-3Ig) enhances immune responses and antitumor activity
Source: Springer Nature journal article supplement (doi:10.1186/1479-5876-8-71), 2010-07-23

**A**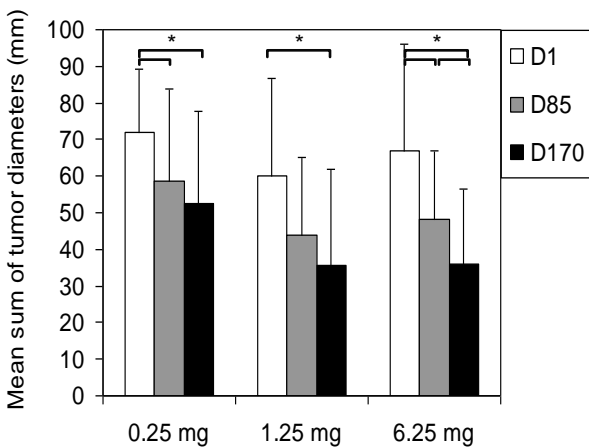**B**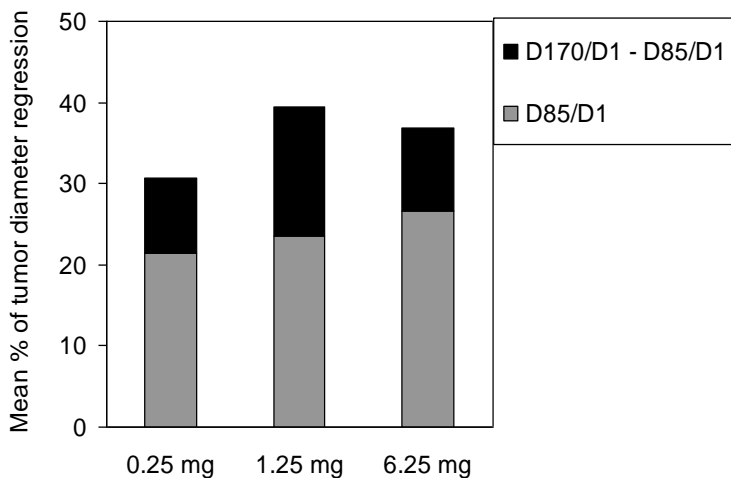**C**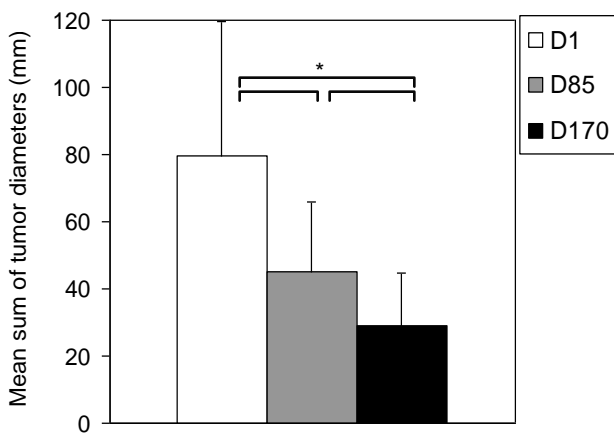

Supplement: 12967_2010_493_MOESM6_ESM.pdf [file 12967_2010_493_MOESM6_ESM.pdf]
